# Supplementary material for: Identification of Single Nucleotide Polymorphism Markers in the Laccase Gene of Shiitake Mushrooms (Lentinula edodes)
Source: PubMed Central journal article supplement — Mycobiology. 2015 Mar 31;43(1):75–80. doi: 10.5941/MYCO.2015.43.1.75 (PMC4397384; doi:10.5941/myco.2015.43.1.75), 2015-03-31
Supplement: mb-43-75-s001.pdf [file mb-43-75-s001.pdf]

**Supplementary Fig. 1.** Multiple sequence alignment of the LELCC (*Letinula edodes* laccase) gene sequences (2,249 bp) of 89 shiitake lines, illustrating locations of the single nucleotide polymorphisms identified. R = A or G, Y = C or T, K = G or T, M = A or C, S = G or C, and W = A or T.

TCTGGCGGCTGAGCTAGTCTGCCTCGTGTACGGAGCCGAAGTCATCCGCGATACTACAACCTATGGTCAGAC  
CGTGAGCGAGAATTTATTCATCGTCAACAAGCAACTCGCCCCAGATGGGTTTCAACGCTCGTAAGTTTACATT  
CGCATCTCCATR\_SNP1\_TCTGTACATTTACATTTTGCAGAACCCTACTCGCTGGGCTCACYCCCTCTACTGGA  
TCTTTTCCGGGYCCAYTAATCTCRGGRAATAAGGTCTGCTTTATCCTTATCAGAATAGTTACAATTTCTTTGACC  
CTACTGCAAACAGGG\_S\_SNP2\_GTCAGATTCAACCTCAACGTCACGGACCAACTTACGGATCCAAGTATGGTT  
AGAAGCACCACCGTTGTGGGTATATCCATGTTTAAATGAAGAATATCAGTCTAATATAACCTTGTTCTGTCAY\_SNP  
3\_TATCAGCACTGGCATGGCCTCTCCAGAAAACGACCAACTATGCAGAY\_SNP4\_GGTGTAGCATTGTTTCT  
CAATGCCCCATTGCCGCCAACCATTCTGTTCTCTACGACTTTCAAGTTCCAGATCAAGCRGGCGTACGATATC  
TAGTCATTTCTTTGAGCAWTTTGTGATTGACAACGCGATTTATAGACCTTCTGGTATCATTACACATATCG  
GTACAAGTGAGCTTGACGGTYCTACGATATGACGTTGCTTTGAYCCCCCGATTGTATAGTATTGCGATGG  
GCTTCGAGGGCCTCTTGAATTTATGACCTCAAGATCCGCGAGGCCTATCTGTACGACGTCGATGACGGTAAG  
TCGCGCGTGSAGRKCTTTTTTCACTTTTTGATAYTCATTGGCTCCGS\_TTTTTCATTWAGAACTACCGTGCTTA  
CTATTGCCGACTGGTAAGTCCCCGGAAGTCTCTRCTYGRACGGTGCTCWCTAAGASTCAACAGGTTTCAC  
AACACCAGCACCAGCTKATCGCAGCCGCGGTTGCTCCCCCTGCCGATGCTACTTTGATTAATGGAAAAGGG  
CGCTATCTTGGTGGGTACGTTTCAACAGGATGAGATTGTTGRCATGCTTTCTAAGATGTTCCCGYTGCATAG  
CCCGCTGTTCTCTCGCGTCATCAATGTACAACAAGGAAAGCGCTATCGTTCCGGATGATTTCAATAGCTT  
GTGATGCCW\_SNP5\_ATCACAATTTTCCATCGACGGTCATAGATTAAACAGTCATAGAAGTTGACGGAGAGAAT  
CAYGAACCTGCCACAGTCGATAAYATTAGATCTTCCCTGGCCAGCGCTATTCTTTCTGTTYGRMTGCAACCC  
AGCCTGTGGATAACTATTGGGTTCTGTCATTGTCTAGTAGTGGCGTTGGTTTTTCCGGATTTACAGGCGGTCT  
CAATTCTGGAATCCTGCGATACCAAGGAGCTCCAGATGCTGATCCGACYACAATAATTGACTGGCGTGGTR  
\_SNP6\_TTGACGGAATCGATGCTGCAACCCTTTGAAAATCCGGGAGCACCTGGACTTCCCTTCCCCGGAGGT  
GCTGACGAAGTGCTCAATY\_SNP7\_TGACGCTCGGTTTCAATCTTCCCGCCACATTCTTTCATGAACGACACCC  
AATACATACCTCCGACTGTTCCAGTYCTTCTACAGATTTTGGAGGAGCACAGTCRCCTCAAGATTTGTTGCC  
GCCAGGCAAGTATATACCTTGCCGATAAATAAGACTATYAGATAAACTTYTTCGGAAACGCTACGCCAGGAG  
GTCCTCATCCATTCCATCTGCATGGCGTAAGAS\_SNP8\_TCATTAGTCCCTCATATTGAACTCATATCTGATTGTA  
CCTGTAGCACTCATTGATGTCGTTCCGGAGCGCAGATAACACCACTTACAATTATRAGAATCCCGTAAGTTGTA  
CCTATGTTGCCAY\_SNP9\_CCAAAGCAGTGTGCTGACTTACAAAATTGAGTCCGTCGAGATGTGACTTCT  
GTAGCTATTGGAAACCAGACAACCATTGATTTGTACCGATAATCCTGGCCCTTGGTTTTTGCATTGGTGAG|  
CCTGTTTGCTATTTGTGGTATTTTATTGATGCTGAAAAGTTTCTTCTCW\_SNP10\_AGCCATATCGACCTTCAT  
TTGGAATTGTGAAATCTTSTACTACTTTACTTTGAAAATAATTTGYTGACCCRCTTTTTCTAGCGGACTTGCCG  
TCGTAATGGCTGAAGCTCCCTCTCTRGTCAAAGCAACTGACGTKACCACTCGTATGTCCAAAGTTCTAGTCT  
TTTCCCGTACTGACTGAGTCATATGATGATCCTTTTTCAGCTGCTTGGGACGAACTGTCCCATTACGACAG  
CTAG
