# Supplementary material for: Identification of Single Nucleotide Polymorphism Markers in the Laccase Gene of Shiitake Mushrooms (Lentinula edodes)
Source: PubMed Central journal article supplement — Mycobiology. 2015 Mar 31;43(1):75–80. doi: 10.5941/MYCO.2015.43.1.75 (PMC4397384; doi:10.5941/myco.2015.43.1.75), 2015-03-31
Supplement: mb-43-75-s002.pdf [file mb-43-75-s002.pdf]

**Supplementary Table 1.** Genotyping at eight SNPs in the LELCC (*Letinula edodes* laccase) gene from each shiitake line

| KFRI No. | Origin | SNP1 | SNP2 | SNP3 | SNP4 | SNP5 | SNP6 | SNP7 | SNP9 |
|----------|--------|------|------|------|------|------|------|------|------|
| 401      | KFRI   | A/G  | G/C  | G/A  | G/A  | T/A  | A/G  | G/A  | G/A  |
| 402      | KFRI   | ?/?  | G/C  | G/A  | G/A  | T/T  | A/G  | G/A  | G/A  |
| 403      | KFRI   | G/G  | C/C  | A/A  | G/G  | T/T  | G/G  | A/A  | G/G  |
| 404      | KFRI   | A/G  | G/G  | G/G  | A/A  | T/T  | A/G  | G/A  | G/A  |
| 405      | KFRI   | A/G  | G/G  | ?/?  | A/A  | T/T  | A/G  | G/A  | G/A  |
| 406      | KFRI   | ?/?  | G/C  | G/A  | G/G  | A/A  | A/A  | G/G  | A/A  |
| 407      | KFRI   | G/G  | C/C  | A/A  | G/G  | T/T  | G/G  | A/A  | G/G  |
| 408      | KFRI   | G/G  | C/C  | A/A  | G/G  | T/T  | G/G  | A/A  | G/G  |
| 299      | KFRI   | ?/?  | G/C  | G/A  | G/A  | T/A  | A/G  | G/A  | G/A  |
| 169      | KFRI   | A/G  | G/C  | G/A  | G/A  | T/A  | A/G  | G/A  | G/A  |
| 1        | FMRI   | ?/?  | G/C  | G/A  | G/A  | T/A  | A/G  | G/A  | G/A  |
| 2        | FMRI   | ?/?  | G/C  | G/A  | G/A  | T/T  | A/G  | G/A  | G/A  |
| 3        | FMRI   | A/G  | G/G  | G/G  | A/A  | T/A  | A/G  | G/A  | G/A  |
| 5        | FMRI   | A/G  | G/G  | G/G  | A/A  | T/T  | A/G  | G/A  | G/A  |
| 137      | FMRI   | A/G  | G/C  | G/A  | G/A  | T/A  | A/G  | G/A  | G/A  |
| 180      | FMRI   | A/G  | G/C  | G/A  | G/A  | T/T  | A/G  | G/A  | G/A  |
| 504      | FMRI   | A/G  | G/C  | G/A  | G/A  | T/A  | A/G  | G/A  | G/A  |
| 689      | FMRI   | ?/?  | G/C  | G/A  | G/A  | T/A  | A/G  | G/A  | G/A  |
| 192      | RDA    | A/G  | G/C  | G/A  | G/A  | T/T  | A/G  | G/A  | G/A  |
| 36       | Wild   | G/G  | C/C  | A/A  | G/G  | T/T  | G/G  | A/A  | G/G  |
| 37       | Wild   | G/G  | ?/?  | ?/?  | ?/?  | ?/?  | G/G  | A/A  | ?/?  |
| 38       | Wild   | G/G  | C/C  | A/A  | G/G  | ?/?  | G/G  | A/A  | G/G  |
| 42       | Wild   | G/G  | ?/?  | ?/?  | ?/?  | T/T  | G/G  | A/A  | ?/?  |
| 51       | Wild   | G/G  | ?/?  | ?/?  | ?/?  | ?/?  | G/G  | A/A  | ?/?  |
| 53       | Wild   | G/G  | ?/?  | ?/?  | ?/?  | ?/?  | ?/?  | A/A  | G/G  |
| 55       | Wild   | A/G  | G/G  | G/A  | ?/?  | T/A  | A/G  | G/A  | G/A  |
| 57       | Wild   | A/G  | G/C  | G/A  | G/A  | T/A  | A/G  | G/A  | G/A  |
| 60       | Wild   | A/G  | ?/?  | ?/?  | ?/?  | ?/?  | ?/?  | G/A  | ?/?  |
| 62       | Wild   | A/G  | G/C  | G/A  | G/A  | T/A  | A/G  | G/A  | G/A  |
| 63       | Wild   | A/G  | G/G  | G/G  | A/A  | T/A  | A/A  | G/A  | G/A  |
| 64       | Wild   | G/G  | C/C  | A/A  | G/G  | T/T  | G/G  | A/A  | G/G  |
| 128      | Wild   | G/G  | ?/?  | ?/?  | ?/?  | ?/?  | G/G  | A/A  | G/G  |
| 129      | Wild   | A/A  | ?/?  | ?/?  | ?/?  | ?/?  | ?/?  | G/G  | ?/?  |
| 135      | Wild   | G/G  | ?/?  | ?/?  | ?/?  | T/T  | ?/?  | A/A  | G/G  |
| 136      | Wild   | G/G  | ?/?  | ?/?  | ?/?  | ?/?  | ?/?  | A/A  | G/G  |
| 176      | Wild   | G/G  | ?/?  | A/A  | ?/?  | T/T  | G/G  | A/A  | G/G  |
| 177      | Wild   | ?/?  | G/C  | G/A  | G/A  | T/A  | A/G  | G/A  | G/A  |
| 188      | Wild   | G/G  | C/C  | A/A  | G/G  | T/T  | G/G  | A/A  | G/G  |
| 369      | Wild   | G/G  | C/C  | A/A  | G/A  | T/A  | A/G  | G/A  | G/A  |
| 370      | Wild   | G/G  | C/C  | A/A  | G/A  | T/A  | A/G  | G/A  | G/A  |
| 411      | Wild   | A/G  | G/G  | ?/?  | A/A  | ?/?  | A/A  | G/A  | G/A  |
| 665      | Wild   | A/A  | ?/?  | ?/?  | ?/?  | T/T  | ?/?  | A/A  | G/G  |
| 666      | Wild   | G/G  | C/C  | A/A  | A/A  | A/A  | A/G  | G/G  | G/A  |
| 669      | Wild   | ?/?  | ?/?  | ?/?  | ?/?  | ?/?  | ?/?  | ?/?  | ?/?  |
| 672      | Wild   | G/G  | ?/?  | ?/?  | ?/?  | T/T  | G/G  | A/A  | G/G  |
| 674      | Wild   | A/G  | G/G  | G/G  | A/A  | T/A  | A/A  | G/A  | G/A  |
| 675      | Wild   | G/G  | C/C  | A/A  | G/G  | T/T  | G/G  | A/A  | G/G  |
| 731      | Wild   | G/G  | C/C  | A/A  | G/G  | T/T  | G/G  | A/A  | G/G  |
| 478      | China  | A/G  | G/C  | G/A  | G/A  | T/A  | A/G  | G/A  | G/A  |
| 480      | China  | A/G  | G/C  | G/A  | G/A  | T/T  | A/G  | G/A  | G/A  |
| 481      | China  | G/G  | ?/?  | A/A  | ?/?  | T/T  | G/G  | A/A  | G/G  |
| 482      | China  | A/G  | G/C  | G/A  | G/A  | T/A  | A/G  | G/A  | G/A  |
| 483      | China  | A/G  | G/C  | G/A  | G/A  | T/T  | A/G  | G/A  | ?/?  |
| 484      | China  | A/G  | G/C  | G/A  | G/A  | T/A  | A/G  | G/A  | ?/?  |
| 485      | China  | A/A  | G/G  | G/G  | A/A  | A/A  | A/A  | G/G  | ?/?  |
| 486      | China  | A/G  | G/C  | G/A  | G/A  | T/T  | A/G  | G/A  | ?/?  |
| 487      | China  | ?/?  | ?/?  | ?/?  | ?/?  | ?/?  | ?/?  | G/A  | ?/?  |
| 488      | China  | A/G  | G/C  | G/A  | G/A  | T/A  | A/G  | G/A  | ?/?  |

Supplementary Table 1. Continued

| KFRI No.   | Origin       | SNP1       | SNP2       | SNP3       | SNP4       | SNP5       | SNP6       | SNP7       | SNP9       |
|------------|--------------|------------|------------|------------|------------|------------|------------|------------|------------|
| 489        | China        | A/G        | G/C        | G/A        | G/A        | A/A        | A/G        | G/A        | G/A        |
| <b>490</b> | <b>China</b> | <b>A/G</b> | <b>G/C</b> | <b>G/A</b> | <b>G/A</b> | <b>T/T</b> | <b>A/G</b> | <b>G/A</b> | <b>G/A</b> |
| 491        | China        | A/G        | G/C        | G/A        | G/A        | T/A        | A/G        | G/A        | G/A        |
| <b>494</b> | <b>China</b> | <b>A/G</b> | <b>G/C</b> | <b>G/A</b> | <b>G/A</b> | <b>T/A</b> | <b>A/G</b> | <b>G/A</b> | <b>??</b>  |
| 495        | China        | A/G        | G/C        | G/A        | G/A        | T/A        | A/G        | G/A        | ??         |
| 497        | China        | A/G        | G/C        | G/A        | G/A        | T/A        | A/G        | G/A        | G/A        |
| 816        | China        | A/A        | G/G        | G/G        | A/A        | A/A        | A/A        | G/G        | A/A        |
| 817        | China        | A/G        | G/C        | G/A        | G/A        | T/T        | A/G        | G/A        | G/A        |
| <b>754</b> | <b>Japan</b> | <b>A/G</b> | <b>G/C</b> | <b>G/A</b> | <b>G/A</b> | <b>T/A</b> | <b>A/G</b> | <b>G/A</b> | <b>G/A</b> |
| 755        | Japan        | A/G        | G/C        | G/A        | G/A        | T/A        | A/G        | G/A        | G/A        |
| 760        | Japan        | A/G        | G/C        | G/A        | G/A        | T/A        | A/G        | G/A        | ??         |
| 761        | Japan        | A/G        | G/G        | G/G        | ??         | ??         | A/G        | G/A        | ??         |
| 751        | Japan        | A/G        | G/C        | G/A        | G/A        | T/T        | A/G        | G/A        | ??         |
| 756        | Japan        | G/G        | C/C        | A/A        | G/G        | T/A        | A/G        | G/A        | G/A        |
| 803        | Japan        | A/G        | G/C        | G/A        | G/A        | T/A        | A/G        | G/A        | G/A        |
| 804        | Japan        | G/G        | C/C        | A/A        | G/G        | T/T        | G/G        | A/A        | G/G        |
| 805        | Japan        | G/G        | C/C        | A/A        | G/G        | T/A        | A/G        | G/A        | G/A        |
| 806        | Japan        | A/G        | G/C        | G/A        | G/A        | T/T        | A/G        | G/A        | G/A        |
| 807        | Japan        | A/G        | G/C        | G/A        | G/A        | T/T        | A/G        | G/A        | G/A        |
| 808        | Japan        | G/G        | C/C        | A/A        | G/G        | T/T        | G/G        | A/A        | G/G        |
| 809        | Japan        | A/G        | G/G        | G/G        | A/A        | T/A        | A/G        | G/A        | G/A        |
| 810        | Japan        | A/G        | G/C        | G/A        | G/A        | T/A        | A/G        | G/A        | G/A        |
| <b>812</b> | <b>Japan</b> | <b>A/G</b> | <b>G/C</b> | <b>G/A</b> | <b>G/A</b> | <b>T/T</b> | <b>A/G</b> | <b>G/A</b> | <b>G/A</b> |
| 813        | Japan        | A/G        | G/C        | G/A        | G/A        | T/T        | A/G        | G/A        | G/A        |
| 814        | Japan        | G/G        | C/C        | A/A        | G/G        | T/T        | G/G        | A/A        | G/G        |
| 815        | Japan        | G/G        | C/C        | A/A        | G/G        | T/T        | G/G        | A/A        | G/G        |
| 812        | Japan        | A/G        | G/C        | G/A        | G/A        | T/T        | A/G        | G/A        | G/A        |
| 813        | Japan        | A/G        | G/C        | G/A        | G/A        | T/T        | A/G        | G/A        | G/A        |

Shiitake lines highlighted in bold could not be distinguished by the SNP markers developed.

SNP, single nucleotide polymorphism; KFRI, Korea Forest Research Institute; FMRI, Forest Mushroom Research Institute, Korea; RDA, Rural Development Administration, Korea; Wild: Korea wild type; ??, amplification failure.
